# Supplementary material for: ASXL3 bridges BRD4 to BAP1 complex and governs enhancer activity in small cell lung cancer
Source: Genome Med. 2020 Jul 15;12:63. doi: 10.1186/s13073-020-00760-3 (PMC7362484; doi:10.1186/s13073-020-00760-3)
Supplement: Supplementary file 1 — Additional file 1: Table S1. Primers used for real-time PCR and constructs. [file 13073_2020_760_MOESM1_ESM.xlsx]

## Sheet: Sheet1
	Primer Name	Primer sequence 5'-3'			Cloning vector	Cloning method/RE
For Construct cloning	GFP-ASXL3-F1-F	TCGAGCTCAAGCTTGTTTGAGATGCAAACATGAAAGACAAG			pLNCX-GFP	Gibson assembly at HpaI site
	GFP-ASXL3-F1-R	CTTTTATTTTATCGATGTTCTAGTCACAGACTTCTAACTGATCGATA			pLNCX-GFP	Gibson assembly at HpaI site
	GFP-ASXL3-F2-F	TCGAGCTCAAGCTTGTTGTTATCGATCAGTTAGAAGTCTGTGAC			pLNCX-GFP	Gibson assembly at HpaI site
	GFP-ASXL3-F2-R	CTTTTATTTTATCGATGTTCTAACCCTCTCCTGGACTTCCCATG			pLNCX-GFP	Gibson assembly at HpaI site
	GFP-ASXL3-F3-F	TCGAGCTCAAGCTTGTTGGAGCCATGGGAAGTCCAGGAGAGGGT			pLNCX-GFP	Gibson assembly at HpaI site
	GFP-ASXL3-F3-R	CTTTTATTTTATCGATGTTCTACGTGGTGCTGTGGTCAACGATGACT			pLNCX-GFP	Gibson assembly at HpaI site
	GFP-ASXL3-F4-F	TCGAGCTCAAGCTTGTTCTGACCTCCAGTTTGTCTCTGACT			pLNCX-GFP	Gibson assembly at HpaI site
	GFP-ASXL3-F4-R	CTTTTATTTTATCGATGTTCTATCGTACAACCAGGCATGCTACACA			pLNCX-GFP	Gibson assembly at HpaI site
	GFP-ASXL3-F5-F	TCGAGCTCAAGCTTGTTGTTATCGATCAGTTAGAAGTCTGTGAC			pLNCX-GFP	Gibson assembly at HpaI site
	GFP-ASXL3-F5-R	CTTTTATTTTATCGATGTTCTAAGATAATTCCAATGGTGAAGGTAACACT			pLNCX-GFP	Gibson assembly at HpaI site
	GFP-ASXL3-F6-F	TCGAGCTCAAGCTTGTTGTTATCGATCAGTTAGAAGTCTGTGAC			pLNCX-GFP	Gibson assembly at HpaI site
	GFP-ASXL3-F6-R	CTTTTATTTTATCGATGTTCTATGGTAAGTTGGACATAAGAGATGCT			pLNCX-GFP	Gibson assembly at HpaI site
	GFP-ASXL3-F7-F	TCGAGCTCAAGCTTGTTGTTATCGATCAGTTAGAAGTCTGTGAC			pLNCX-GFP	Gibson assembly at HpaI site
	GFP-ASXL3-F7-R	CTTTTATTTTATCGATGTTCTATGGTTGGCTCTTGATTATAAAAGGT			pLNCX-GFP	Gibson assembly at HpaI site
	GFP-ASXL3-F8-F	TCGAGCTCAAGCTTGTTGTTATCGATCAGTTAGAAGTCTGTGAC			pLNCX-GFP	Gibson assembly at HpaI site
	GFP-ASXL3-F8-R	CTTTTATTTTATCGATGTTCTATGATATCTCTGAATCTCTACTTTCA			pLNCX-GFP	Gibson assembly at HpaI site
	GFP-ASXL3-F9-F	TCGAGCTCAAGCTTGTTTTACCTTCACCATTGGAATTATCT			pLNCX-GFP	Gibson assembly at HpaI site
	GFP-ASXL3-F9-R	CTTTTATTTTATCGATGTTCTAACCCTCTCCTGGACTTCCCATG			pLNCX-GFP	Gibson assembly at HpaI site
	GFP-ASXL3-F10-F	TCGAGCTCAAGCTTGTTAATGAAAGTAGAGATTCAGAGATA			pLNCX-GFP	Gibson assembly at HpaI site
	GFP-ASXL3-F10-R	CTTTTATTTTATCGATGTTCTAGACTGGTTGGCTCTTGATTATAAAAGGTG			pLNCX-GFP	Gibson assembly at HpaI site
	GFP-ASXL3-F11-F	TCGAGCTCAAGCTTGTTAGGGTTCCCCCTCTCAAGATTCAGCTTTCCAAAATTGGGCCACCTTTTATAATCAAGAGCCAACCAGTCTAGAACATCGATAAAATAAAAG			pLNCX-GFP	Gibson assembly at HpaI site
	GFP-ASXL3-F11-R	CTTTTATTTTATCGATGTTCTAGACTGGTTGGCTCTTGATTATAAAAGGTGGCCCAATTTTGGAAAGCTGAATCTTGAGAGGGGGAACCCTAACAAGCTTGAGCTCGA			pLNCX-GFP	Gibson assembly at HpaI site
	GFP-ASXL3-F12-F	TCGAGCTCAAGCTTGTTAACATATCATCTAGCAGCCCACCTGAGAAAGAACAGCCTCCCAGAGAGGAACCAAGGGTTTAGAACATCGATAAAATAAAAG			pLNCX-GFP	Gibson assembly at HpaI site
	GFP-ASXL3-F12-R	CTTTTATTTTATCGATGTTCTAAACCCTTGGTTCCTCTCTGGGAGGCTGTTCTTTCTCAGGTGGGCTGCTAGATGATATGTTAACAAGCTTGAGCTCGA			pLNCX-GFP	Gibson assembly at HpaI site
	GFP-ASXL3-F13-F	TCGAGCTCAAGCTTGTTTTTGGAATCTGTAAGGAAAAGAGAGCTAGGATAGAAGATGATCAGTCAACCCGGAACATATAGAACATCGATAAAATAAAAG			pLNCX-GFP	Gibson assembly at HpaI site
	GFP-ASXL3-F13-R	CTTTTATTTTATCGATGTTCTATATGTTCCGGGTTGACTGATCATCTTCTATCCTAGCTCTCTTTTCCTTACAGATTCCAAAAACAAGCTTGAGCTCGA			pLNCX-GFP	Gibson assembly at HpaI site
	GFP-ASXL3-F14-F	TCGAGCTCAAGCTTGTTAATGAAAGTAGAGATTCAGAGATATCAAAGAGAAAAACTGCAGAGCAACACAGCTTTGGATAGAACATCGATAAAATAAAAG			pLNCX-GFP	Gibson assembly at HpaI site
	GFP-ASXL3-F14-R	CTTTTATTTTATCGATGTTCTATCCAAAGCTGTGTTGCTCTGCAGTTTTTCTCTTTGATATCTCTGAATCTCTACTTTCATTAACAAGCTTGAGCTCGA			pLNCX-GFP	Gibson assembly at HpaI site
	GFP-ASXL3-F15-F	TCGAGCTCAAGCTTGTTAATGAAAGTAGAGATTCAGAGATA			pLNCX-GFP	Gibson assembly at HpaI site
	GFP-ASXL3-F15-R	CTTTTATTTTATCGATGTTCTAGATTATAAAAGGTGGCCCAATTTTG			pLNCX-GFP	Gibson assembly at HpaI site
	GFP-ASXL3-F16-F	TCGAGCTCAAGCTTGTTAATGAAAGTAGAGATTCAGAGATA			pLNCX-GFP	Gibson assembly at HpaI site
	GFP-ASXL3-F16-R	CTTTTATTTTATCGATGTTCTACCCAATTTTGGAAAGCTGAATCT			pLNCX-GFP	Gibson assembly at HpaI site
	GFP-ASXL3-F17-F	TCGAGCTCAAGCTTGTTAATGAAAGTAGAGATTCAGAGATA			pLNCX-GFP	Gibson assembly at HpaI site
	GFP-ASXL3-F17-R	CTTTTATTTTATCGATGTTCTACTGAATCTTGAGAGGGGGAACCCT			pLNCX-GFP
	GFP-ASXL3-F18-F	TCGAGCTCAAGCTTGTTAATGAAAGTAGAGATTCAGAGATA			pLNCX-GFP	Gibson assembly at HpaI site
	GFP-ASXL3-F18-R	CTTTTATTTTATCGATGTTCTAGGGAACCCTTGGTTCCTCTCTGG			pLNCX-GFP
	Flag-BRD4-F1F	GACGATGACAAGCTTGTTATGTCTGCGGAGAGCG			pLNCX-Flag	Gibson assembly at HpaI site
	Flag-BRD4-F1R	CTTTTATTTTATCGATGTTCTACTGGGTCTGCGGAGGAG			pLNCX-Flag
	Flag-BRD4-F2F	GACGATGACAAGCTTGTTATGATAGTCCAGGCAAAAG			pLNCX-Flag	Gibson assembly at HpaI site
	Flag-BRD4-F2R	CTTTTATTTTATCGATGTTCTACTTCTTGGCAAACATCTC			pLNCX-Flag
	Flag-BRD4-F3F	GACGATGACAAGCTTGTTACCACCATTGACCCCATTC			pLNCX-Flag	Gibson assembly at HpaI site
	Flag-BRD4-F3R	CTTTTATTTTATCGATGTTCTAGCTATCGCTGCTGCTGTC			pLNCX-Flag
	Flag-BRD4-F4F	GACGATGACAAGCTTGTTGTCCGATTGATGTTCTCCAAC			pLNCX-Flag	Gibson assembly at HpaI site
	Flag-BRD4-F4R	CTTTTATTTTATCGATGTTCTACTTGTCCTCTTCCTCCGAC			pLNCX-Flag
	Flag-BRD4-F5F	GACGATGACAAGCTTGTTAAGCACAAAAGGAAAGAGGAAGTGG			pLNCX-Flag	Gibson assembly at HpaI site
	Flag-BRD4-F5R	CTTTTATTTTATCGATGTTCTAAATGAAGGGTGGGGGCGAGG			pLNCX-Flag
	Flag-BRD4-F6F	GACGATGACAAGCTTGTTCACCATCATCACCACCATCAG			pLNCX-Flag	Gibson assembly at HpaI site
	Flag-BRD4-F6R	CTTTTATTTTATCGATGTTCTAGGAAGGGAGTAGCGGCGT			pLNCX-Flag
	Flag-BRD4-F7F	GACGATGACAAGCTTGTTGTGAAGGTGCAGTCCCAGC			pLNCX-Flag	Gibson assembly at HpaI site
	Flag-BRD4-F7R	CTTTTATTTTATCGATGTTCTAGTGCCGGGGTGAATGGTGGTG			pLNCX-Flag
	Flag-BRD4-F8F	GACGATGACAAGCTTGTTCACAAGTCGGACCCCTAC			pLNCX-Flag	Gibson assembly at HpaI site
	Flag-BRD4-F8R	CTTTTATTTTATCGATGTTCTACTTCTCACGCTCCTCTTTC			pLNCX-Flag
	Flag-BRD4-F9F	GACGATGACAAGCTTGTTGCCCCTGACAAGGACAAA			pLNCX-Flag	Gibson assembly at HpaI site
	Flag-BRD4-F9R	CTTTTATTTTATCGATGTTCTAGAAAAGATTTTCTTCAAATATTGAC			pLNCX-Flag
	ASXL3-DBBM-F	AGGGTTCCCTCCAAACCTGAGTCTCGAGCATC			pcDNA3	Mutagenesis with PCR
	ASXL3-DBBM-R	GGTTTGGAGGGAACCCTTGGTTCCTCTCTG			pcDNA3
	GFP-ASXL1-Frag1-F	TCGAGCTCAAGCTTGTTATGAAGGACAAACAGAAGAAGAAGA			pLNCX-GFP	Gibson assembly at HpaI site
	GFP-ASXL1-Frag1-R	AATGTCTGCGAGGGTCCTGGCGCCAGT			pLNCX-GFP
	GFP-ASXL1-Frag2-F	ACTGGCGCCAGGACCCTCGCAGACATT			pLNCX-GFP	Gibson assembly at HpaI site
	GFP-ASXL1-Frag2-R	GGACCCAGGCATGGACAGGCACAC			pLNCX-GFP
	GFP-ASXL1-Frag3-F	GTGTGCCTGTCCATGCCTGGGTCC			pLNCX-GFP	Gibson assembly at HpaI site
	GFP-ASXL1-Frag3-R	CTTTTATTTTATCGATGTTTTATCTCACCACAAGGCACAATAC			pLNCX-GFP
	GFP-ASXL2-FL-F	TCGAGCTCAAGCTTGTTATGAGGGAAAAGGGACGTAGGAAG			pLNCX-GFP	Gibson assembly at HpaI site
	GFP-ASXL2-FL-R	CTTTTATTTTATCGATGTTTTACCGAACGACAAGGCAGGAGAC			pLNCX-GFP
For protein purification	His_BRD_ET_F	GCGCGGCAGCCATATGGCTAAGCACAAAAGGAAAGAGGAAGTGG			pet28A+	Gibson assembly at NheI site
	His_BRD_ET_R	GCTGTCCACCAGTCATGCTCTAAATGAAGGGTGGGGGCGAGG			pet28A+
	ASXL3-Ab1-F	GCGCGGCAGCCATATGGCTAAAGAACATCCCTTTGTGAGTTCT			pet28A+	Gibson assembly at NheI site
	ASXL3-Ab1-R	GCTGTCCACCAGTCATGCTCTAATCACTGCAGCTGAGGGCTGCTCT			pet28A+
	ASXL3-Ab2-F	GCGCGGCAGCCATATGGCTGACTCTCTGGTTGCACACCCGAC			pet28A+	Gibson assembly at NheI site
	ASXL3-Ab2-R	GCTGTCCACCAGTCATGCTCTAAGAGGCTCCCTCTGCAGCCGGAG			pet28A+
For CRISPR cloning	Non-targeting gRNA-F	CACCGCTGAAAAAGGAAGGAGTTGA			pLentiV2	BsmBI
	Non-targeting gRNA-R	AAACTCAACTCCTTCCTTTTTCAGC			pLentiV2
	BAP1-gRNA-F1	CACCCACGGACGTATCATCCACCA			pLentiV2	BsmBI
	BAP1-gRNA-R1	AAACTGGTGGATGATACGTCCGTG			pLentiV2
	BAP1-gRNA-F2	CACCGAACCGTCAGACAGTACTAG			pLentiV2	BsmBI
	BAP1-gRNA-R2	AAACCTAGTACTGTCTGACGGTTC			pLentiV2
	BAP1-gRNA-F3	CACCTCTACCCCATTGACCATGGT			pLentiV2	BsmBI
	BAP1-gRNA-R3	AAACACCATGGTCAATGGGGTAGA			pLentiV2
	BAP1-gRNA-F4	CACCGTCCATCAAGACTAGCAGCG			pLentiV2	BsmBI
	BAP1-gRNA-R4	AAACCGCTGCTAGTCTTGATGGAC			pLentiV2
For QPCR	ASXL3-QF	CACCAATGACAGCAAAGCAG
	ASXL3-QR	GTTCCATCCCCTATTCGAGTG
	GADD45A-QF	GGAGAGCAGAAGACCGAAAG
	GADD45A-QR	AGGCACAACACCACGTTATC
	BCL2-QF	GTGGATGACTGAGTACCTGAAC
	BCL2-QR	GCCAGGAGAAATCAAACAGAGG
	TCF4-QF	AACCATTACAGCACCTCTTCC
	TCF4-QR	TGGAGAATAGATCGAAGCAAGTG
	EIF4E-QF	AAACCTGCGGCTGATCTC
	EIF4E-QR	CCACATAGGCTCAATACCATCC
	18S-QF	GGCCCTGTAATTGGAATGAGTC
	18S-QR	CCAAGATCCAACTACGAGCTT
	ASCL1-QF1	AGCTTCTCGACTTCACCAAC
	ASCL1-QR1	CAACGCCACTGACAAGAAAG
	MYCL-QF	GCGAACCCAAGACCCAG
	MYCL-QR	AAGAGCCAATGCCTGACC
