# Supplementary material for: ASXL3 bridges BRD4 to BAP1 complex and governs enhancer activity in small cell lung cancer
Source: Genome Med. 2020 Jul 15;12:63. doi: 10.1186/s13073-020-00760-3 (PMC7362484; doi:10.1186/s13073-020-00760-3)
Supplement: Supplementary file 5 — Additional file 5: Table S4. ASXL3 target genes that are occupied by ASXL3 at TSS or NonTSS regions. [file 13073_2020_760_MOESM5_ESM.xlsx]

## Sheet: TSS
PDGFRA
FAM167A
TLR5
PLLP
SIX5
TLE6
GPSM3
ROR2
AJUBA
FOXA2
SLC25A23
BMP3
NCAM2
RDM1
PPM1J
BMPR1B
EXPH5
MGST1
SEMA5B
KIT
TSC22D3
RAB33A
ACVR1C
TXNIP
TBX6
TAGLN2
SERPINE2
ESRRG
SOX2
NETO1
HIBADH
SORBS1
AMOT
PROCA1
SMIM20
DDIT3
BMF
LTBP1
PTBP3
GRTP1
FZD4
POU3F2
NT5M
GAB1
ASNS
BCL2
PPFIA4
MXI1
GSN
PAX6
HPSE
LPAR2
MAML3
RNF152
HDAC9
TSKU
FOSL2
CLYBL
STXBP6
TXNRD3
NR2F2
FADS3
PCBP3
SLC3A2
ASXL3
DDAH2
TCF4
RNF182
CITED2
HMG20B
CEP44
GPD2
NFIB
TRIQK
RAB28
ATF4
RHOBTB3
GPR161
GRB7
PPARGC1A
UBAC2
DDR1
PPP1R15B
ELOVL2
SIPA1L3
EIF2D
NBR1
RABGAP1L
SOCS5
ZFAND1
BARD1
AARS
ZDHHC2
WWC2
ABTB1
FOXO3
RPA1
ANKRD18A
RNF144A
PSD3
TSC22D2
PTAR1
ZBTB8B
MANEA
GPT2
ATF7IP
VCPIP1
ALDH2
HECA
KANK2
HMGB2
JADE1
SP1
YPEL3
DUT
OGT

## Sheet: Non_TSS
RBM12B
C17orf58
TMEM132E
STAT5A
TWIST1
RSAD1
EMP3
TARS
C1QTNF1
CXXC4
ARHGAP31
PCGF5
DACT1
TESC
FAM172A
BAALC
ABCG1
FAM174B
CA12
MB
CRB1
STOM
SLC6A15
WDR72
FAM131C
TMEM31
CBLN2
ST8SIA4
CLVS1
SALL3
BDNF
FBLN7
ARHGEF19
KIF19
NT5DC1
MS4A15
SLC36A4
SLC2A12
PPP1R32
AMPH
PAQR8
UNC5D
GAB2
CPA5
NRP2
SLC26A9
IGSF21
MEGF11
B3GNT5
TMEM163
PAX9
NINL
ERMP1
CLMN
FUNDC2
EPS8L2
NECAB1
ST14
CHST6
SLC7A14
CPNE5
KIAA1522
PREX1
KLHL14
KIAA1210
TMCC3
RCN3
IMPACT
ARGLU1
SUSD4
SCGN
BNC2
RBMS1
PALLD
PARVB
FAM189A1
DPY19L1
ZNF423
PHYHIP
TOX
WSCD2
SH3BP4
OPN3
GAD1
ST8SIA2
SIM1
MTHFD2
PRKG2
PRKCH
TNNT2
NIPSNAP3B
PTPN14
LMO7
SLC15A1
ISM2
EPHA2
DYNC1I1
HYKK
ABCC3
LTBP4
CLIP2
TNNT1
SMARCA2
PVALB
PTPRZ1
MN1
LAMB1
ELK4
BMP7
BCL6
FOXC1
CDH7
DDR2
ITGB5
DAB1
ZNF536
SLC8A1
TPCN1
BEGAIN
TMTC4
DNAJC5B
TMEM229B
RPH3A
EGFR
MRAP2
PRKD1
FGF14
KCNK9
RASA3
SLC30A3
RIPPLY3
NTNG1
ANKRD29
MBNL2
CDKN1C
BOC
AMOTL1
VEGFA
DEPTOR
ARHGAP36
CORO6
PAX5
ITGBL1
NFIX
TJP3
IKZF3
CHRNA3
CHST9
CAPG
COL25A1
CDH13
KLF9
SPOCK3
CHMP3
NRSN1
PRODH
TRABD2B
RASAL1
ATF5
PDE1C
IGSF1
TTC39B
VEPH1
MPP1
ANKRD33B
CD8A
KIF2C
TLE2
GPR63
ELOVL6
SULF1
LAMA3
ATXN3
CYBRD1
CDCA7L
BBC3
VCAN
TUBE1
KCTD19
PHACTR2
SLC4A4
GCNT1
FOXN3
ROR1
WIPF3
DLGAP3
ALDH5A1
MPPED1
NAAA
FAM83G
ZNF704
PDE8B
ANO6
DAPL1
LGR6
ISYNA1
PLAUR
RARB
GRM5
GRIN2B
CHRNB1
ADORA1
GLDC
ADA
IRF2BP2
SYT4
FABP7
QRFPR
NPTX1
CDK18
ATF3
PSAT1
ZNF395
PGR
NR5A2
TCF7L2
PCDH17
WNT11
SHOX2
TMEM30B
EML6
LMAN1
DMRTA1
HTR3A
HSPB1
SPRY2
GADD45A
ARHGEF6
CD34
ARL4C
NFATC1
SLC17A7
CA14
PIK3R5
GPA33
KCNQ5
NHSL1
CA8
EIF1
KDELR3
NKAIN1
FSTL5
GRM8
C22orf42
SLC7A5
FEZ1
GRP
SORCS2
JDP2
XBP1
CRYBA2
TRIM29
NEK6
PTP4A3
FAM84B
CRABP1
GPRIN3
LAMB3
COLCA1
SLITRK4
TRH
ZFP36L2
LOXL4
CLVS2
FAM189A2
GSX2
FST
HES7
KCNJ4
ST6GAL2
WSCD1
SEMA3C
WNT4
CNKSR3
KLRG2
SLC47A1
SLC39A8
FRMD3
TPBG
KCNF1
ABCA5
SULF2
SGPP2
KCTD12
RCN1
SYT12
MYO1E
RREB1
PTHLH
GPR37
ZNF217
ITPR3
SOX9
DDIT4
CD83
FRMPD3
ID4
FAM129A
IRX3
ROBO3
UACA
CRTAP
CEBPB
FSCN1
MET
CNTLN
TMEM44
TMEM229A
PM20D2
ZC3H6
PKIB
ZNF548
OGFRL1
RNF150
PELI1
R3HDM2
KCNMB4
XPOT
FBLN1
MAN2A1
ITPR2
IDH2
TRMT11
NTN4
CDH3
PROS1
EIF4B
PLP1

## Sheet: No binding
PDZRN3
NUPR1
KLK11
SUSD3
STMN2
FZD2
MRC2
SULT1E1
INHBE
SYNPR
HIF3A
FGF21
TEX19
NDNF
AMN
MEF2B
FSTL1
FGF19
INHBC
SSTR1
RP11-766F14.2
ACSF2
DCST2
FHL1
AKNA
STAC2
NDRG1
TMEM200A
GJA3
RSPO2
FBN3
LPAR3
HMCN2
TNFAIP8L3
ADAMTS7
IGFBP4
TAL1
C6orf141
IGF2BP2
NID1
C6orf223
THEMIS2
GUCY1B3
EDIL3
AQP4
CYP2J2
ZDHHC22
LAMA1
GPR26
COL1A2
SYNPO
CLPSL2
FEV
ST3GAL1
C1RL
PRSS8
C19orf77
CD8B
FAM110C
GPR12
PCK1
ACSS1
TMIGD2
S1PR1
CHRNA4
OLFML2A
CHST1
RBP7
ATHL1
SERPINB9
PCK2
GULP1
GABRA5
COLCA2
NGEF
ERBB4
DSG2
TAC3
SRL
ACVRL1
PPAP2B
NKX6-2
TSHZ3
COL6A2
ASS1
GPR144
SLC43A1
GIPC3
C1QTNF4
MKX
METTL7A
GALNT12
ACSS3
TMEM74B
DNAI2
STON1
CNTN3
PTCHD1
TTPA
GRIN3A
SFRP5
PPAP2C
MPZL2
FAM132B
TPM2
HS6ST2
DGAT2
PRMT8
VSTM2B
IMPA2
CLDN11
LONRF3
CYP27C1
GRM4
PLA2G7
TMCO4
PAQR5
ABCG4
KCNG1
SMOC1
SYT13
MEGF6
MFNG
CACNG5
ARAP3
ANKRD34B
PCSK9
TRIM7
DACT2
PCDH7
GATM
NAT16
WDR86
HOXA13
TCF7L1
WNT5A
TCEA3
CPS1
NKPD1
EFHD1
LAMA2
RERG
STAC
LCK
RNF128
IFITM3
SH2D2A
MDFIC
SRPX
GDF15
PLEKHH2
TNNI1
SERPINB6
LANCL3
FBXO27
SLC7A11
AC103809.2
KCNIP1
FHAD1
XKRX
DOCK6
FAM43A
STC2
ZFP36L1
ARHGAP9
SLC9A5
APLN
ADCYAP1
CLEC2D
CRIM1
RARG
FGF13
CNN2
MYO1D
LAD1
PLIN3
PTGER3
PALD1
PLEKHG6
SQRDL
PADI2
TDRD6
CTSH
SLIT3
POU2AF1
RGMA
YAP1
MDFI
NMUR2
CHRDL1
HTRA1
HSD11B2
TMPRSS3
CYP27A1
RAB25
PYROXD2
PDE3B
NFIA
ICAM1
DERL3
PRSS16
PENK
COL9A3
CSPG5
FLNC
IGSF10
F2R
TRIM47
PCDH8
KCNK3
GIPR
IL22RA1
ZYX
REST
SLCO2A1
C11orf87
C1QL4
PLCD1
MAP3K15
JPH3
TRPC6
FAM149A
ZDHHC15
BMP6
C3orf80
CRIP3
PTPRU
FUT1
COL18A1
LRRC3DN
SAMD13
MACC1
ELK3
SYTL4
TRAF1
MLXIPL
PSTPIP2
PRRG1
GABRB2
EMX1
PPM1N
CTD-2054N24.2
SAMD4A
MTMR11
POU3F3
SMO
PCOLCE
PNMT
TMC5
GRAMD1C
ATP1B2
IL17RE
NUP62CL
FGFR2
GRASP
ASAP3
LBX2
N4BP2L1
CDH23
KCNJ6
C1orf204
SLC29A4
ACACB
RAB31
CHODL
WFDC2
CLU
SORBS3
FGF9
WBSCR17
FUCA2
SGMS2
THRB
RP11-169F17.1
FILIP1
LEPR
S100A1
DMBX1
MPZ
NTNG2
IL27RA
GXYLT2
HTATIP2
UCN3
PPP2R2C
AGRN
MRAS
SHANK2
MVP
LAYN
ECEL1
SAMD5
TMEM54
SLC45A3
SYNGR4
TSPAN11
YPEL4
YPEL2
NLGN3
NMU
MAN1A1
CSMD2
SLC8B1
AK5
SLC30A10
ABLIM1
OTOG
COL4A3
MYLK
AMER2
ADM2
TFR2
GDAP1L1
PHF11
TMEM47
SYT2
RNF217
EMID1
COL9A2
PDLIM3
LIN7A
PTER
PIK3IP1
RUNX2
HEATR4
HOXD10
LAMB2
C1orf95
FAM211B
FAM114A1
FAM78A
HCG27
SATB1
MOB3C
P2RY1
CCDC102A
EMX2
AGPAT2
GNB4
MCOLN2
AMBN
LAMP3
C17orf103
PITPNM3
CHAC1
UNC5A
RASD2
DOC2A
FCHSD1
SPRY3
SYDE2
COL16A1
CCDC85A
FCGRT
SLC25A27
SLC2A13
DIAPH2
SLC16A9
LGI2
DDC
CREG2
C14orf37
TBC1D1
PTN
IL4R
PRPS2
HPCAL4
PTH2R
VSTM2A
NHS
TGIF2
TOX2
BGLAP
PPEF1
SGSM1
PTPRK
OSBPL10
OAS3
EBF4
GSDMB
CACNA2D2
EPB41L2
TNFAIP8
STEAP3
HHEX
GSTM2
NR3C1
NOD1
OTUD1
KCND3
SLC44A1
TRIB3
GJB2
JAM2
LTBP2
SPOCK2
TEAD4
MLTK
MTL5
SH3KBP1
HAUS4
NOTCH2
RIMS3
CCDC3
DSEL
MCAM
LPPR4
PDE5A
STOX2
BSPRY
KLHL24
STK3
H6PD
PNPLA3
PHGDH
NPTXR
PDCD4
IFIH1
IFNGR2
KCNB1
FRMD4B
HR
SYT7
AFF3
ACBD7
SWAP70
LPHN3
DLGAP1
CEBPG
FAM131B
HLA-A
JPH1
ITGB1
SLMO1
PRKAR2B
UBE2QL1
DNPH1
RBM15
SV2A
RBM20
MACROD1
KIAA1377
KIAA1644
HEBP1
RLIM
CPLX1
LRP10
COL22A1
ARHGEF4
ATP1A3
IRF6
FBXL4
CCNB1IP1
SMARCD3
MXD3
DNAH10OS
CTSF
EIF4E3
MEOX2
GCLC
PLAG1
ME3
IRS1
PYGO1
ZBTB10
NXPH4
TRIB2
CBS
LRRC20
CTSB
EPHB2
RHBDL3
FOXD2
CHPT1
MGAT5B
GARS
FN1
NREP
POC1B
PTPRN
C11orf54
KCNK1
GAS6
TSPO
KCNC1
FOXM1
BMP8B
SYNGR1
RNF169
JMY
ITGAV
DFNB31
ASIC1
ATXN7L2
MAT2B
HSPA2
LPCAT4
RNF157
TDRP
CPE
TMEM106B
FAM107B
OXCT2
THAP2
BCORL1
KLHL13
NAB1
CD55
UNC5B
KIAA1430
PPP1R9B
YPEL5
RAVER2
IGBP1
HSF4
SLC1A5
GALNT16
TMEM123
HIP1
2020-09-03
MPST
NUSAP1
CPLX2
RALGPS2
ARL5B
C1orf115
FAM129B
CAPN2
SUMF2
CCNA2
SEPN1
WDR27
PDZD4
MCM6
