# Supplementary material for: ASXL3 bridges BRD4 to BAP1 complex and governs enhancer activity in small cell lung cancer
Source: Genome Med. 2020 Jul 15;12:63. doi: 10.1186/s13073-020-00760-3 (PMC7362484; doi:10.1186/s13073-020-00760-3)
Supplement: Supplementary file 6 — Additional file 6: Table S5. Super enhancers that are co-occupied by both ASXL3 and BRD4. [file 13073_2020_760_MOESM6_ESM.xlsx]

## Sheet: Sheet1
CAP1
RLF
ZMPSTE24
PPT1
RIMS3
TRIT1
ZNF684
PPIE
CROCC
LOC100133985
BTG2
SHC1
EPHX1
FOXO6
MALAT1
FBXO31
LINC00908
